# Supplementary material for: Paternal grandfather’s access to food predicts all-cause and cancer mortality in grandsons
Source: PubMed Central journal article supplement (PMC6290014; doi:10.1038/s41467-018-07617-9), 2018-12-11
Supplement: 41467_2018_7617_MOESM1_ESM.pdf [file 41467_2018_7617_MOESM1_ESM.pdf]

**Supplementary Information. Cover page**

**Vågerö et al. Paternal grandfather's access to food influences all-cause and cancer mortality in grandsons**

This document consists of Supplementary Tables 1-7

Supplementary Table 1: All-cause mortality in G2 men and women by grandparental harvest exposures in SGP: hazard ratios with 95% confidence limits (in brackets) based on Cox regression. Mortality follow-up 1961-2015.

|                             | <b>Men</b>        |             |                         |             | <b>Women</b>      |             |                   |             |
|-----------------------------|-------------------|-------------|-------------------------|-------------|-------------------|-------------|-------------------|-------------|
|                             | Model 1           |             | Model 2                 |             | Model 1           |             | Model 2           |             |
| <b>Maternal grandmother</b> |                   |             |                         |             |                   |             |                   |             |
| Good                        | 0.84              | [0.52,1.36] | 0.89                    | [0.53,1.48] | 1.05              | [0.65,1.71] | 1.01              | [0.61,1.69] |
| Intermediate                | 1.00              | ref         | 1.00                    | ref         | 1.00              | ref         | 1.00              | ref         |
| Poor                        | 0.92              | [0.57,1.48] | 0.95                    | [0.58,1.55] | 0.52              | [0.23,1.18] | 0.51              | [0.24,1.11] |
| <b>Maternal grandfather</b> |                   |             |                         |             |                   |             |                   |             |
| Good                        | 0.73              | [0.43,1.25] | 0.74                    | [0.44,1.24] | 0.77              | [0.41,1.46] | 0.79              | [0.40,1.56] |
| Intermediate                | 1.00              | ref         | 1.00                    | ref         | 1.00              | ref         | 1.00              | ref         |
| Poor                        | 0.76              | [0.46,1.27] | 0.76                    | [0.49,1.19] | 1.15              | [0.62,2.11] | 1.17              | [0.64,2.15] |
| Observations                | 2987              |             | 2987                    |             | 2904              |             | 2904              |             |
| Number of deaths            | 377               |             | 377                     |             | 253               |             | 253               |             |
|                             | Model 1           |             | Model 2                 |             | Model 1           |             | Model 2           |             |
| <b>Paternal grandmother</b> |                   |             |                         |             |                   |             |                   |             |
| Good                        | 0.88              | [0.46,1.66] | 0.93                    | [0.49,1.76] | 0.82              | [0.38,1.75] | 0.85              | [0.40,1.81] |
| Intermediate                | 1.00              | ref         | 1.00                    | ref         | 1.00              | ref         | 1.00              | ref         |
| Poor                        | 0.68              | [0.36,1.28] | 0.70                    | [0.35,1.37] | 1.11              | [0.60,2.06] | 1.13              | [0.62,2.08] |
| <b>Paternal grandfather</b> |                   |             |                         |             |                   |             |                   |             |
| Good                        | 1.50 <sup>a</sup> | [0.99,2.26] | <b>1.55<sup>b</sup></b> | [1.02,2.35] | 0.71 <sup>a</sup> | [0.36,1.40] | 0.74 <sup>b</sup> | [0.38,1.46] |
| Intermediate                | 1.00              | ref         | 1.00                    | ref         | 1.00              | ref         | 1.00              | ref         |
| Poor                        | 0.92              | [0.52,1.62] | 0.93                    | [0.51,1.68] | 1.08              | [0.60,1.94] | 1.11              | [0.63,1.94] |
| Observations                | 3224              |             | 3224                    |             | 3051              |             | 3051              |             |
| Number of deaths            | 339               |             | 339                     |             | 222               |             | 222               |             |

Statistically significant estimates (95% CI) in bold type

**Model 1:** Adjusted for G2 birth year, sibship size and sibling order, mother's/father's harvest exposure in SGP, social class, income and education, and any parental death before age 18

**Model 2:** + linear trends for grandparents birth years, with confidence limits based on sibling cluster robust standard errors

<sup>a</sup> Interaction:  $p = 0.065$

<sup>b</sup> Interaction:  $p = 0.053$

Supplementary Table 2: CVD and diabetes mortality in G2 by grandparental harvest exposures in SGP: hazard ratios with 95% confidence limits (in brackets) based on Cox regression. Mortality follow-up 1961-2015.

| <b>CVD mortality</b>        |         |             |             |              |
|-----------------------------|---------|-------------|-------------|--------------|
|                             | Model 1 |             | Model 2     |              |
| <b>Maternal grandmother</b> |         |             |             |              |
| Good                        | 0.81    | [0.44,1.50] | 0.90        | [0.50,1.63]  |
| Intermediate                | 1.00    | ref         | 1.00        | ref          |
| Poor                        | 0.69    | [0.32,1.48] | 0.73        | [0.36,1.48]  |
| <b>Maternal grandfather</b> |         |             |             |              |
| Good                        | 0.93    | [0.48,1.83] | 0.97        | [0.46,2.04]  |
| Intermediate                | 1.00    | ref         | 1.00        | ref          |
| Poor                        | 0.82    | [0.40,1.67] | 0.83        | [0.44,1.59]  |
| Observations                | 5891    |             | 5891        |              |
| Number of deaths            | 204     |             | 204         |              |
|                             | Model 1 |             | Model 2     |              |
| <b>Paternal grandmother</b> |         |             |             |              |
| Good                        | 0.77    | [0.28,2.09] | 0.74        | [0.27,2.03]  |
| Intermediate                | 1.00    | ref         | 1.00        | ref          |
| Poor                        | 1.07    | [0.52,2.20] | 1.05        | [0.49,2.25]  |
| <b>Paternal grandfather</b> |         |             |             |              |
| Good                        | 1.05    | [0.53,2.06] | 0.99        | [0.50,1.95]  |
| Intermediate                | 1.00    | ref         | 1.00        | ref          |
| Poor                        | 0.84    | [0.39,1.81] | 0.81        | [0.39,1.69]  |
| Observations                | 6275    |             | 6275        |              |
| Number of deaths            | 176     |             | 176         |              |
| <b>Diabetes mortality</b>   |         |             |             |              |
|                             | Model 1 |             | Model 2     |              |
| <b>Maternal grandmother</b> |         |             |             |              |
| Good                        | 2.25    | [0.86,5.88] | <b>3.38</b> | [1.18,9.65]  |
| Intermediate                | 1.00    | ref         | 1.00        | ref          |
| Poor                        | 0.96    | [0.22,4.14] | 1.12        | [0.31,4.07]  |
| <b>Maternal grandfather</b> |         |             |             |              |
| Good                        | 0.46    | [0.06,3.42] | 0.55        | [0.07,4.61]  |
| Intermediate                | 1.00    | ref         | 1.00        | ref          |
| Poor                        | 0.52    | [0.07,3.79] | 0.59        | [0.08,4.26]  |
| Observations                | 5891    |             | 5891        |              |
| Number of deaths            | 41      |             | 41          |              |
|                             | Model 1 |             | Model 2     |              |
| <b>Paternal grandmother</b> |         |             |             |              |
| Good                        | 1.24    | [0.16,9.34] | 1.25        | [0.15,10.12] |
| Intermediate                | 1.00    | ref         | 1.00        | ref          |
| Poor                        | 0.90    | [0.12,6.87] | 0.91        | [0.12,6.69]  |
| <b>Paternal grandfather</b> |         |             |             |              |
| Good                        | 0.00    | [0.00,]     | <b>0.00</b> | [0.00,]      |
| Intermediate                | 1.00    | ref         | 1.00        | ref          |
| Poor                        | 1.95    | [0.45,8.43] | 1.92        | [0.40,9.32]  |
| Observations                | 6275    |             | 6275        |              |
| Number of deaths            | 26      |             | 26          |              |

Statistically significant estimates (95% CI) in bold type

**Model 1:** Adjusted for G2 gender, birth year, sibship size and sibling order, mother's/father's harvest exposure in SGP, social class, income and education, and any parental death before age 18

**Model 2:** + linear trends for grandparents birth years, with confidence limits based on sibling cluster robust standard errors

Supplementary Table 3: Cancer mortality in G2 men and women by grandparental harvest exposures in SGP: hazard ratios with 95% confidence limits (in brackets) based on Cox regression. Mortality follow-up 1961-2015.

|                                       | Men                     |             |                         |             | Women             |             |                   |             |
|---------------------------------------|-------------------------|-------------|-------------------------|-------------|-------------------|-------------|-------------------|-------------|
|                                       | All cancers             |             |                         |             |                   |             |                   |             |
|                                       | Model 1                 |             | Model 2                 |             | Model 1           |             | Model 2           |             |
| <b>Maternal grandmother</b>           |                         |             |                         |             |                   |             |                   |             |
| Good                                  | 0.93                    | [0.41,2.14] | 0.89                    | [0.33,2.39] | 0.66              | [0.29,1.51] | 0.63              | [0.27,1.48] |
| Intermediate                          | 1.00                    | ref         | 1.00                    | ref         | 1.00              | ref         | 1.00              | ref         |
| Poor                                  | 1.36                    | [0.65,2.84] | 1.32                    | [0.63,2.76] | 0.36              | [0.09,1.46] | 0.35              | [0.09,1.39] |
| <b>Maternal grandfather</b>           |                         |             |                         |             |                   |             |                   |             |
| Good                                  | 0.45                    | [0.14,1.44] | 0.43                    | [0.13,1.40] | 0.62              | [0.23,1.69] | 0.66              | [0.25,1.78] |
| Intermediate                          | 1.00                    | ref         | 1.00                    | ref         | 1.00              | ref         | 1.00              | ref         |
| Poor                                  | 0.54                    | [0.20,1.49] | 0.53                    | [0.20,1.41] | 1.45              | [0.67,3.14] | 1.51              | [0.70,3.29] |
| Observations                          | 2987                    |             | 2987                    |             | 2904              |             | 2904              |             |
| Number of deaths                      | 124                     |             | 124                     |             | 129               |             | 129               |             |
|                                       | Model 1                 |             | Model 2                 |             | Model 1           |             | Model 2           |             |
| <b>Paternal grandmother</b>           |                         |             |                         |             |                   |             |                   |             |
| Good                                  | 1.09                    | [0.39,3.00] | 1.20                    | [0.40,3.62] | 0.87              | [0.32,2.39] | 0.93              | [0.35,2.47] |
| Intermediate                          | 1.00                    | ref         | 1.00                    | ref         | 1.00              | ref         | 1.00              | ref         |
| Poor                                  | 1.37                    | [0.59,3.18] | 1.45                    | [0.63,3.34] | 0.98              | [0.40,2.41] | 1.01              | [0.42,2.46] |
| <b>Paternal grandfather</b>           |                         |             |                         |             |                   |             |                   |             |
| Good                                  | <b>3.35<sup>a</sup></b> | [1.95,5.76] | <b>3.44<sup>b</sup></b> | [1.87,6.34] | 0.73 <sup>a</sup> | [0.30,1.80] | 0.74 <sup>b</sup> | [0.29,1.89] |
| Intermediate                          | 1.00                    | ref         | 1.00                    | ref         | 1.00              | ref         | 1.00              | ref         |
| Poor                                  | 0.65                    | [0.20,2.06] | 0.63                    | [0.20,1.99] | 0.66              | [0.24,1.81] | 0.67              | [0.25,1.79] |
| Observations                          | 3224                    |             | 3224                    |             | 3051              |             | 3051              |             |
| Number of deaths                      | 117                     |             | 117                     |             | 119               |             | 119               |             |
|                                       | Model 1                 |             | Model 2                 |             | Model 1           |             | Model 2           |             |
| <b>Cancers not related to smoking</b> |                         |             |                         |             |                   |             |                   |             |
| <b>Paternal grandmother</b>           |                         |             |                         |             |                   |             |                   |             |
| Good                                  | 0.00                    | [0.00,]     | <b>0.00</b>             | [0.00,]     | 0.93              | [0.29,2.99] | 1.03              | [0.32,3.35] |
| Intermediate                          | 1.00                    | ref         | 1.00                    | ref         | 1.00              | ref         | 1.00              | ref         |
| Poor                                  | 1.01                    | [0.31,3.28] | 1.13                    | [0.35,3.65] | 0.83              | [0.26,2.66] | 0.88              | [0.28,2.77] |
| <b>Paternal grandfather</b>           |                         |             |                         |             |                   |             |                   |             |
| Good                                  | <b>3.51<sup>c</sup></b> | [1.77,6.97] | <b>4.39<sup>d</sup></b> | [2.02,9.53] | 0.58 <sup>c</sup> | [0.18,1.86] | 0.59 <sup>d</sup> | [0.18,1.96] |
| Intermediate                          | 1.00                    | ref         | 1.00                    | ref         | 1.00              | ref         | 1.00              | ref         |
| Poor                                  | 0.78                    | [0.19,3.26] | 0.86                    | [0.21,3.52] | 0.45              | [0.11,1.85] | 0.45              | [0.11,1.85] |
| Observations                          | 3224                    |             | 3224                    |             | 3051              |             | 3051              |             |
| Number of deaths                      | 70                      |             | 70                      |             | 84                |             | 84                |             |
|                                       | Model 1                 |             | Model 2                 |             | Model 1           |             | Model 2           |             |
| <b>Cancers related to smoking</b>     |                         |             |                         |             |                   |             |                   |             |
| <b>Paternal grandmother</b>           |                         |             |                         |             |                   |             |                   |             |
| Good                                  | 2.68                    | [0.91,7.84] | 2.63                    | [0.77,9.02] | 0.80              | [0.11,5.92] | 0.79              | [0.12,5.30] |
| Intermediate                          | 1.00                    | ref         | 1.00                    | ref         | 1.00              | ref         | 1.00              | ref         |
| Poor                                  | 2.27                    | [0.67,7.73] | 2.28                    | [0.70,7.41] | 1.21              | [0.28,5.27] | 1.21              | [0.32,4.57] |
| <b>Paternal grandfather</b>           |                         |             |                         |             |                   |             |                   |             |
| Good                                  | <b>3.22<sup>e</sup></b> | [1.33,7.81] | 2.45 <sup>f</sup>       | [0.94,6.37] | 1.15 <sup>e</sup> | [0.27,4.86] | 1.17 <sup>f</sup> | [0.30,4.67] |
| Intermediate                          | 1.00                    | ref         | 1.00                    | ref         | 1.00              | ref         | 1.00              | ref         |
| Poor                                  | 0.48                    | [0.06,3.56] | 0.40                    | [0.06,2.74] | 1.14              | [0.26,4.91] | 1.15              | [0.32,4.17] |
| Observations                          | 3224                    |             | 3224                    |             | 3051              |             | 3051              |             |
| Number of deaths                      | 47                      |             | 47                      |             | 35                |             | 35                |             |

Statistically significant estimates (95% CI) in bold type

**Model 1:** Adjusted for G2 birth year, sibship size and sibling order, mother's/father's harvest exposure in SGP, social class, income and education, and any parental death before age 18

**Model 2:** + linear trends for grandparents birth years, with confidence limits based on sibling cluster robust standard errors

<sup>a</sup> Interaction:  $p = 0.006$

<sup>b</sup> Interaction:  $p = 0.005$

<sup>c</sup> Interaction:  $p = 0.013$

<sup>d</sup> Interaction:  $p = 0.009$

<sup>e</sup> Interaction:  $p = 0.222$

<sup>f</sup> Interaction:  $p = 0.240$

Supplementary Table 4: All-cause mortality, CVD mortality and diabetes mortality in G1 men and women by parental harvest exposures in SGP: hazard ratios with 95% confidence limits (in brackets) based on Cox regression. Mortality follow-up 1952-2015.

|                  | Men                     |             |                         |             | Women             |             |                   |             |
|------------------|-------------------------|-------------|-------------------------|-------------|-------------------|-------------|-------------------|-------------|
|                  | All-cause mortality     |             |                         |             |                   |             |                   |             |
|                  | Model 1                 |             | Model 2                 |             | Model 1           |             | Model 2           |             |
| <b>Mother</b>    |                         |             |                         |             |                   |             |                   |             |
| Good             | 1.15                    | [0.97,1.35] | 1.14                    | [0.96,1.36] | 1.02              | [0.86,1.21] | 1.01              | [0.83,1.24] |
| Intermediate     | 1.00                    | ref         | 1.00                    | ref         | 1.00              | ref         | 1.00              | ref         |
| Poor             | 1.04                    | [0.88,1.22] | 1.03                    | [0.87,1.22] | 0.95              | [0.79,1.14] | 0.95              | [0.78,1.15] |
| <b>Father</b>    |                         |             |                         |             |                   |             |                   |             |
| Good             | 1.07                    | [0.93,1.24] | 1.08                    | [0.93,1.26] | 1.05              | [0.89,1.24] | 1.08              | [0.91,1.27] |
| Intermediate     | 1.00                    | ref         | 1.00                    | ref         | 1.00              | ref         | 1.00              | ref         |
| Poor             | 1.11                    | [0.95,1.30] | 1.11                    | [0.96,1.30] | 0.89              | [0.74,1.07] | 0.90              | [0.73,1.10] |
| Observations     | 3820                    |             | 3820                    |             | 3460              |             | 3460              |             |
| Number of deaths | 3419                    |             | 3419                    |             | 2758              |             | 2758              |             |
|                  | CVD mortality           |             |                         |             |                   |             |                   |             |
|                  | Model 1                 |             | Model 2                 |             | Model 1           |             | Model 2           |             |
| <b>Mother</b>    |                         |             |                         |             |                   |             |                   |             |
| Good             | 1.21                    | [0.99,1.48] | 1.22                    | [0.99,1.49] | 1.04              | [0.83,1.30] | 1.02              | [0.80,1.31] |
| Intermediate     | 1.00                    | ref         | 1.00                    | ref         | 1.00              | ref         | 1.00              | ref         |
| Poor             | 0.97                    | [0.79,1.20] | 0.97                    | [0.78,1.21] | 0.89              | [0.70,1.13] | 0.88              | [0.71,1.10] |
| <b>Father</b>    |                         |             |                         |             |                   |             |                   |             |
| Good             | 1.04                    | [0.86,1.26] | 1.07                    | [0.88,1.29] | 1.09              | [0.88,1.36] | 1.10              | [0.88,1.36] |
| Intermediate     | 1.00                    | ref         | 1.00                    | ref         | 1.00              | ref         | 1.00              | ref         |
| Poor             | 1.10                    | [0.90,1.34] | 1.11                    | [0.91,1.35] | 0.92              | [0.73,1.16] | 0.91              | [0.70,1.17] |
| Observations     | 3820                    |             | 3820                    |             | 3460              |             | 3460              |             |
| Number of deaths | 2179                    |             | 2179                    |             | 1667              |             | 1667              |             |
|                  | Diabetes mortality      |             |                         |             |                   |             |                   |             |
|                  | Model 1                 |             | Model 2                 |             | Model 1           |             | Model 2           |             |
| <b>Mother</b>    |                         |             |                         |             |                   |             |                   |             |
| Good             | 1.17                    | [0.68,2.02] | 1.20                    | [0.70,2.05] | 1.06              | [0.60,1.87] | 1.04              | [0.58,1.88] |
| Intermediate     | 1.00                    | ref         | 1.00                    | ref         | 1.00              | ref         | 1.00              | ref         |
| Poor             | 0.93                    | [0.52,1.66] | 0.93                    | [0.51,1.68] | 0.80              | [0.42,1.51] | 0.78              | [0.41,1.49] |
| <b>Father</b>    |                         |             |                         |             |                   |             |                   |             |
| Good             | <b>1.75<sup>a</sup></b> | [1.16,2.64] | <b>1.84<sup>b</sup></b> | [1.21,2.79] | 0.94 <sup>a</sup> | [0.53,1.66] | 0.89 <sup>b</sup> | [0.50,1.58] |
| Intermediate     | 1.00                    | ref         | 1.00                    | ref         | 1.00              | ref         | 1.00              | ref         |
| Poor             | 1.48                    | [0.90,2.44] | 1.52                    | [0.91,2.55] | 0.77              | [0.41,1.46] | 0.76              | [0.39,1.47] |
| Observations     | 3820                    |             | 3820                    |             | 3460              |             | 3460              |             |
| Number of deaths | 289                     |             | 289                     |             | 255               |             | 255               |             |

Statistically significant estimates (95% CI) in bold type

**Model 1:** Adjusted for G1 birth year and sibling position, and parents' social class and marital status at G1 birth

**Model 2:** + linear trends for parents birth years, with confidence limits based on sibling cluster robust standard errors

<sup>a</sup> Interaction:  $p = 0.076$

<sup>b</sup> Interaction:  $p = 0.078$

Supplementary Table 5: CVD hospitalization or mortality in G2 by grandparental harvest exposures in SGP: hazard ratios with 95% confidence limits (in brackets) based on Cox regression. Follow-up 1961-2015.

|                             | Model 1 |             | Model 2 |             |
|-----------------------------|---------|-------------|---------|-------------|
| <b>Maternal grandmother</b> |         |             |         |             |
| Good                        | 0.95    | [0.78,1.16] | 0.94    | [0.75,1.19] |
| Intermediate                | 1.00    | ref         | 1.00    | ref         |
| Poor                        | 1.09    | [0.88,1.35] | 1.09    | [0.87,1.37] |
| <b>Maternal grandfather</b> |         |             |         |             |
| Good                        | 1.00    | [0.80,1.24] | 1.01    | [0.80,1.26] |
| Intermediate                | 1.00    | ref         | 1.00    | ref         |
| Poor                        | 1.11    | [0.90,1.37] | 1.12    | [0.89,1.39] |
| Observations                | 5891    |             | 5891    |             |
| Number of events            | 1756    |             | 1756    |             |
|                             | Model 1 |             | Model 2 |             |
| <b>Paternal grandmother</b> |         |             |         |             |
| Good                        | 0.92    | [0.69,1.23] | 0.92    | [0.68,1.24] |
| Intermediate                | 1.00    | ref         | 1.00    | ref         |
| Poor                        | 0.85    | [0.65,1.10] | 0.84    | [0.65,1.10] |
| <b>Paternal grandfather</b> |         |             |         |             |
| Good                        | 0.96    | [0.77,1.20] | 0.95    | [0.75,1.20] |
| Intermediate                | 1.00    | ref         | 1.00    | ref         |
| Poor                        | 0.92    | [0.71,1.17] | 0.91    | [0.70,1.18] |
| Observations                | 6275    |             | 6275    |             |
| Number of events            | 1550    |             | 1550    |             |

Statistically significant estimates (95% CI) in bold type

**Model 1:** Adjusted for G2 gender, birth year, sibship size and sibling order, mother's/father's harvest exposure in SGP, social class, income and education, and any parental death before age 18

**Model 2:** + linear trends for grandparents birth years, with confidence limits based on sibling cluster robust standard errors

Supplementary Table 6: Diabetes hospitalization or mortality in G2 by grandparental harvest exposures in SGP: hazard ratios with 95% confidence limits (in brackets) based on Cox regression. Follow-up 1961-2015.

|                             | Model 1     |             | Model 2 |             |
|-----------------------------|-------------|-------------|---------|-------------|
| <b>Maternal grandmother</b> |             |             |         |             |
| Good                        | 1.13        | [0.76,1.69] | 1.22    | [0.78,1.91] |
| Intermediate                | 1.00        | ref         | 1.00    | ref         |
| Poor                        | 1.02        | [0.64,1.63] | 1.06    | [0.62,1.82] |
| <b>Maternal grandfather</b> |             |             |         |             |
| Good                        | <b>0.48</b> | [0.25,0.90] | 0.53    | [0.25,1.12] |
| Intermediate                | 1.00        | ref         | 1.00    | ref         |
| Poor                        | 0.75        | [0.45,1.27] | 0.80    | [0.47,1.35] |
| Observations                | 5891        |             | 5891    |             |
| Number of events            | 385         |             | 385     |             |
|                             | Model 1     |             | Model 2 |             |
| <b>Paternal grandmother</b> |             |             |         |             |
| Good                        | 0.99        | [0.55,1.76] | 1.01    | [0.58,1.77] |
| Intermediate                | 1.00        | ref         | 1.00    | ref         |
| Poor                        | 0.87        | [0.49,1.56] | 0.88    | [0.50,1.54] |
| <b>Paternal grandfather</b> |             |             |         |             |
| Good                        | 1.08        | [0.68,1.72] | 1.13    | [0.72,1.79] |
| Intermediate                | 1.00        | ref         | 1.00    | ref         |
| Poor                        | 1.16        | [0.71,1.91] | 1.20    | [0.77,1.87] |
| Observations                | 6275        |             | 6275    |             |
| Number of events            | 329         |             | 329     |             |

Statistically significant estimates (95% CI) in bold type

**Model 1:** Adjusted for G2 gender, birth year, sibship size and sibling order, mother's/father's harvest exposure in SGP, social class, income and education, and any parental death before age 18

**Model 2:** + linear trends for grandparents birth years, with confidence limits based on sibling cluster robust standard errors

Supplementary Table 7: What is the power in our replication to detect the most important results in the Överkalix studies?

| <b>All-cause mortality results (Kaati et al., 2007)</b>                   |                         |                     |          |                                  |                                    |                 |
|---------------------------------------------------------------------------|-------------------------|---------------------|----------|----------------------------------|------------------------------------|-----------------|
| <i>Males</i>                                                              |                         |                     |          |                                  |                                    |                 |
| <i>Food access</i>                                                        | <i>Exposed ancestor</i> | <i>Hazard Ratio</i> | <i>p</i> | <i>Deaths_Överkalix</i>          | <i>Deaths/Total N_replication</i>  | <i>POWER</i>    |
| good                                                                      | father                  | 1.70                | 0.01     | 146                              | 3419/3820                          | <b>&gt;0.99</b> |
| good                                                                      | paternal grandfather    | 1.45                | 0.05     | 164                              | 339/3224                           | <b>0.93</b>     |
| poor                                                                      | paternal grandfather    | 0.60                | 0.01     | 164                              | 339/3224                           | <b>0.99</b>     |
| <i>Females</i>                                                            |                         |                     |          |                                  |                                    |                 |
| <i>Food access</i>                                                        | <i>Exposed ancestor</i> | <i>Hazard Ratio</i> | <i>p</i> | <i>Deaths_Överkalix</i>          | <i>Deaths/Total N, replication</i> | <i>POWER</i>    |
| good                                                                      | paternal grandmother    | 1.75                | 0.01     | 139                              | 222/3051                           | <b>0.99</b>     |
| poor                                                                      | paternal grandmother    | 0.71                | 0.01     | 135                              | 222/3051                           | <b>0.72</b>     |
| <b>Diabetes and cardiovascular mortality results (Kaati et al., 2002)</b> |                         |                     |          |                                  |                                    |                 |
| <i>Diabetes, males and females combined</i>                               |                         |                     |          |                                  |                                    |                 |
| <i>Food access</i>                                                        | <i>Exposed ancestor</i> | <i>Odds Ratio</i>   | <i>p</i> | <i>Deaths/Total N_ Överkalix</i> | <i>Deaths/Total N_replication</i>  | <i>POWER</i>    |
| good                                                                      | father                  | 0.14                | 0.06     | 19/239                           | 544/7280                           | <b>&gt;0.99</b> |
| good                                                                      | paternal grandfather    | 2.34                | 0.09     | 19/239                           | 26/6275                            | <b>0.76</b>     |
| poor                                                                      | paternal grandfather    | 0.35                | 0.09     | 19/239                           | 26/6275                            | <b>0.87</b>     |
| poor                                                                      | maternal grandmother    | 2.73                | 0.06     | 19/239                           | 41/5891                            | <b>0.90</b>     |
| <i>CVD, males and females combined</i>                                    |                         |                     |          |                                  |                                    |                 |
| <i>Food access</i>                                                        | <i>Exposed ancestor</i> | <i>Odds Ratio</i>   | <i>p</i> | <i>Deaths/Total N_ Överkalix</i> | <i>Deaths/Total N_replication</i>  | <i>POWER</i>    |
| poor                                                                      | father                  | 0.42                | 0.05     | 128/239                          | 3846/7280                          | <b>&gt;0.99</b> |

Notes: Relative probabilities were reconstructed from sample sizes and odds ratios reported in (Kaati et al., 2002). The power analyses for all-cause mortality were computed using Schoenfeld's sample-size formula for the proportional-hazards regression model. For Diabetes and CVD mortality the power was computed using a two-sample proportions test (only deceased individuals in UBCoS were used to determine the sample size).
